# Supplementary material for: Health-related quality of life in persons with West Nile virus infection: a longitudinal cohort study
Source: Springer Nature journal article supplement (doi:10.1186/s12955-017-0787-5), 2017-10-23

### ADDITIONAL FILE 3

Accompanying the manuscript: “Health-related quality of life in persons with West Nile infection: a longitudinal cohort study”

**Figure S1. Predicted values from best beta-regression model for area under the curve (AUC) past one year for patients with neuroinvasive disease (pink) and nonneuroinvasive disease (blue).**

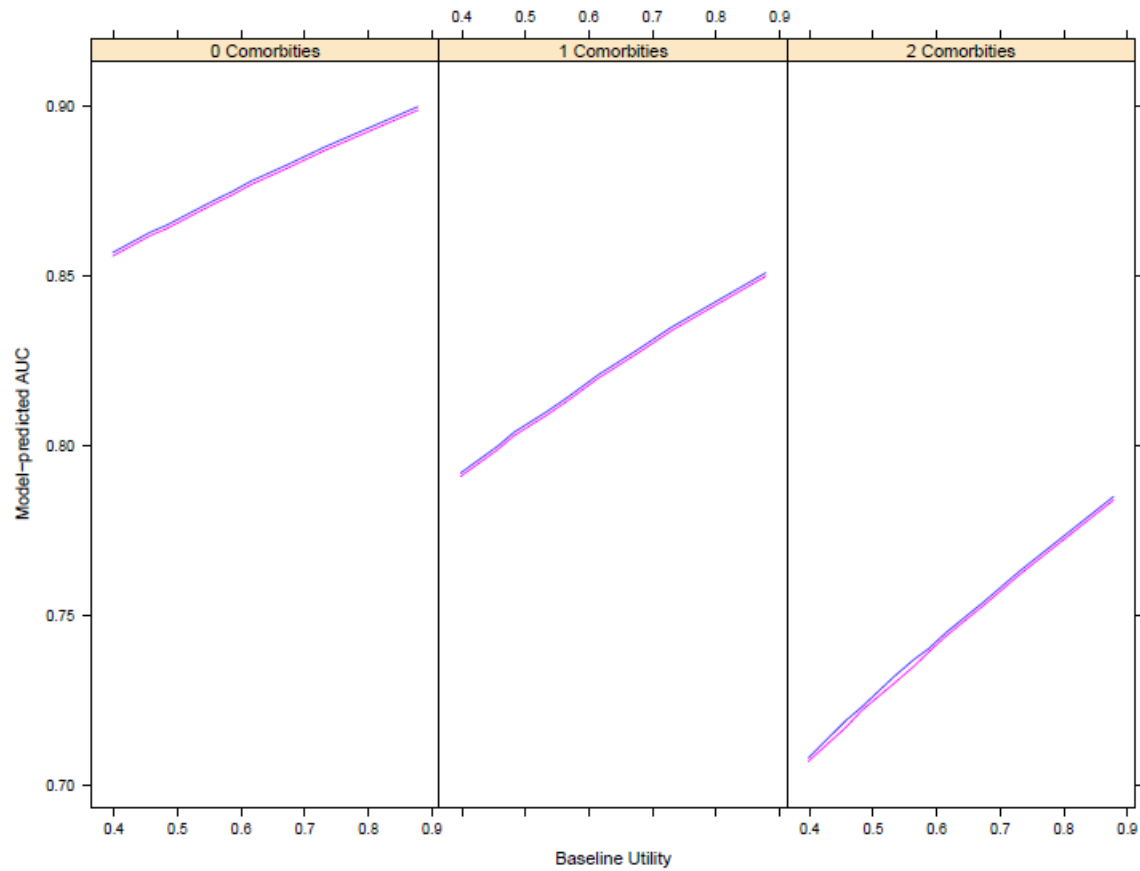

Supplement: MOESM3 [file 15159888]
